# Supplementary material for: Identification of novel alternative splicing isoform biomarkers and their association with overall survival in colorectal cancer
Source: PubMed Central journal article supplement (PMC7275609; doi:10.1186/s12876-020-01288-x), 2020-06-05

Figure S2.

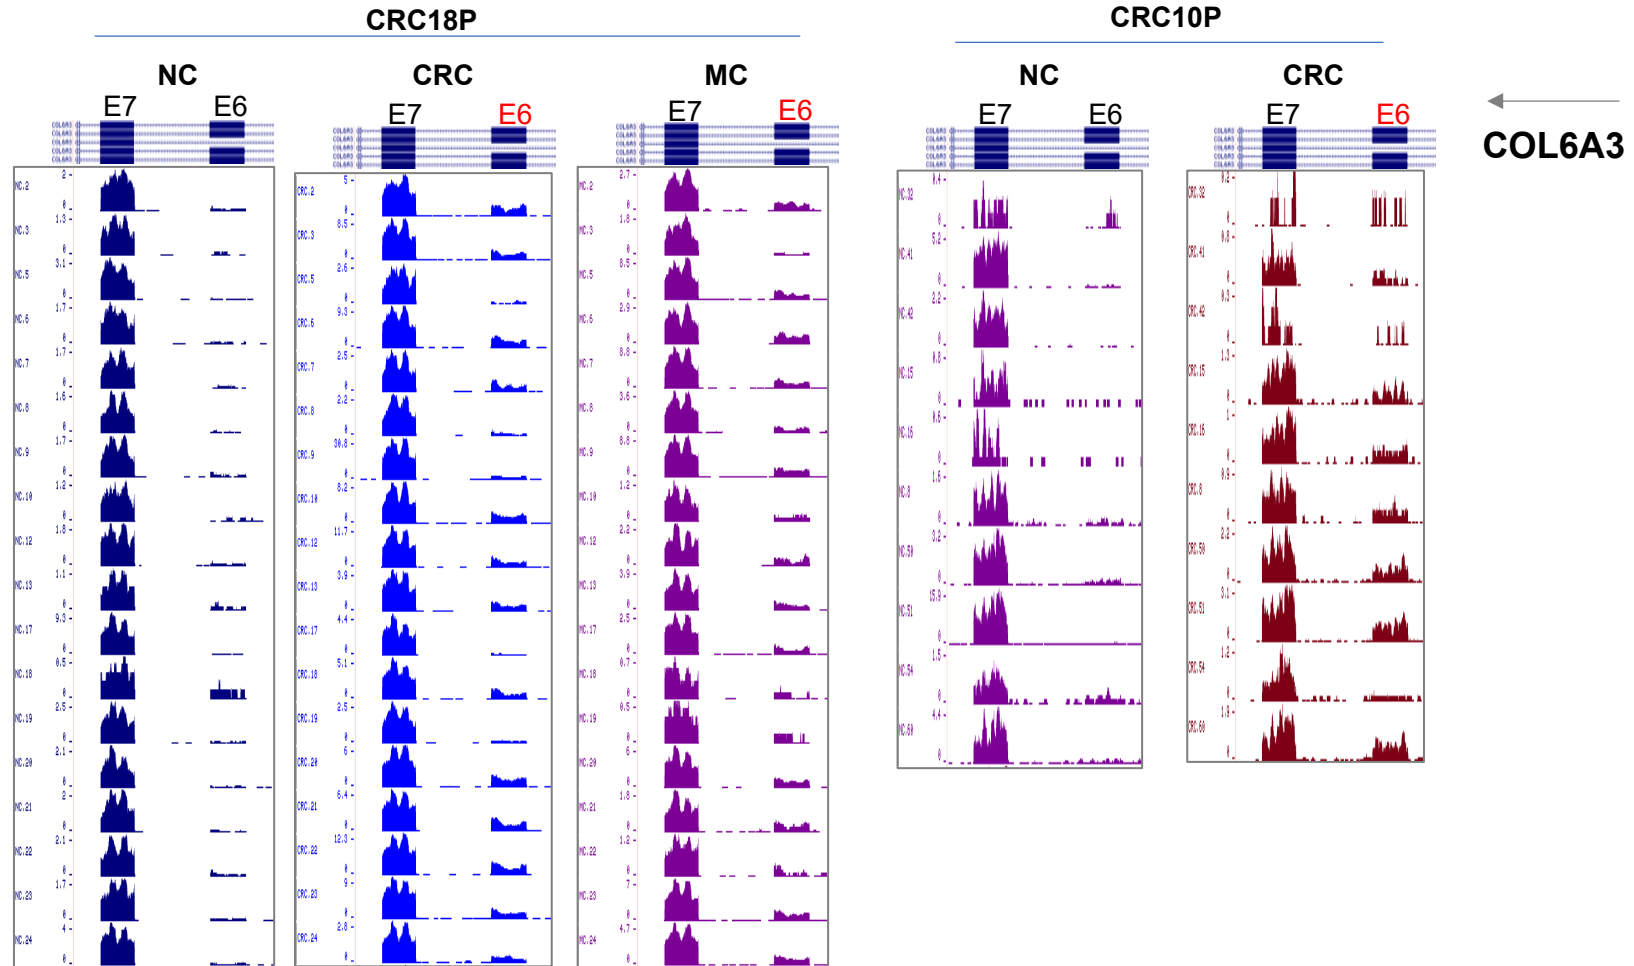

Supplement: 12876_2020_1288_MOESM2_ESM.pdf [file 12876_2020_1288_MOESM2_ESM.pdf]
