# Supplementary material for: Identification of novel alternative splicing isoform biomarkers and their association with overall survival in colorectal cancer
Source: PubMed Central journal article supplement (PMC7275609; doi:10.1186/s12876-020-01288-x), 2020-06-05

Figure S13

A

|   |                      | 1      |        |        | 2        |        |        | 3       |        |                                   |
|---|----------------------|--------|--------|--------|----------|--------|--------|---------|--------|-----------------------------------|
|   | Spearman correlation | HKDC1  | CALD1  | CLK1   | SERPINA1 | CD44   | COL6A3 | ARHGEF9 | HNF4A  |                                   |
| 1 | HKDC1                | 1.000  | 0.310  | 0.343  | -0.184   | -0.217 | -0.073 | -0.306  | -0.111 | junction_chr10.70980254.70986963  |
|   | CALD1                | 0.310  | 1.000  | 0.367  | -0.149   | -0.259 | -0.235 | -0.370  | -0.245 | junction_chr7.134618141.134625843 |
|   | CLK1                 | 0.343  | 0.367  | 1.000  | -0.054   | 0.003  | -0.026 | -0.307  | -0.233 | junction_chr2.201724938.201725961 |
| 2 | SERPINA1             | -0.184 | -0.149 | -0.054 | 1.000    | 0.421  | 0.418  | 0.376   | 0.286  | junction_chr14.94849578.94856794  |
|   | CD44                 | -0.217 | -0.259 | 0.003  | 0.421    | 1.000  | 0.529  | 0.444   | 0.267  | junction_chr11.35211612.35236399  |
|   | COL6A3               | -0.073 | -0.235 | -0.026 | 0.418    | 0.529  | 1.000  | 0.360   | 0.299  | junction_chr2.238285987.238289558 |
| 3 | ARHGEF9              | -0.306 | -0.370 | -0.307 | 0.376    | 0.444  | 0.360  | 1.000   | 0.410  | junction_chrX.62944591.63004996   |
|   | HNF4A                | -0.111 | -0.245 | -0.233 | 0.286    | 0.267  | 0.299  | 0.410   | 1.000  | junction_chr20.43030127.43034698  |

B

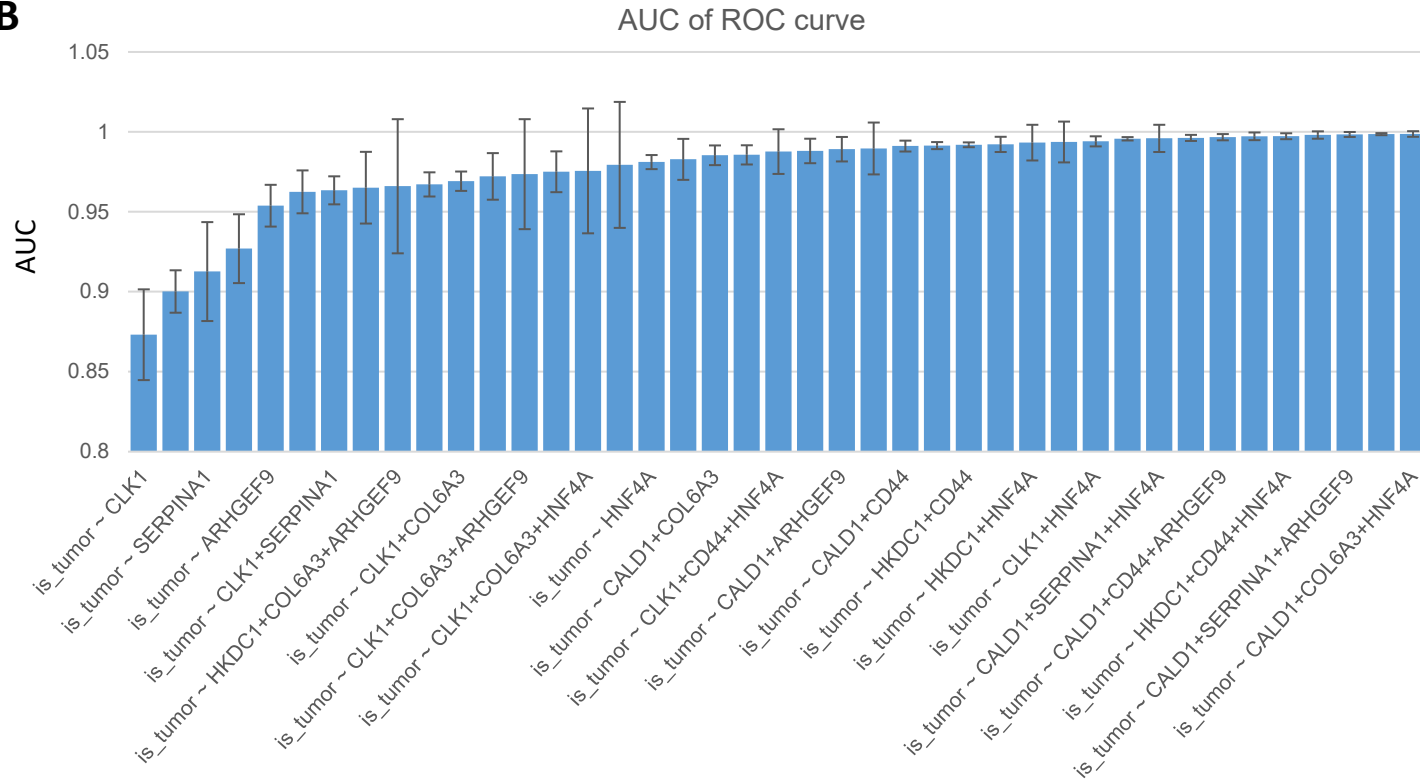

Supplement: 12876_2020_1288_MOESM13_ESM.pdf [file 12876_2020_1288_MOESM13_ESM.pdf]
